# Supplementary material for: ABC Transporters in Dictyostelium discoideum Development
Source: PubMed Central journal article supplement (PMC3743828; doi:10.1371/journal.pone.0070040), 2013-08-14

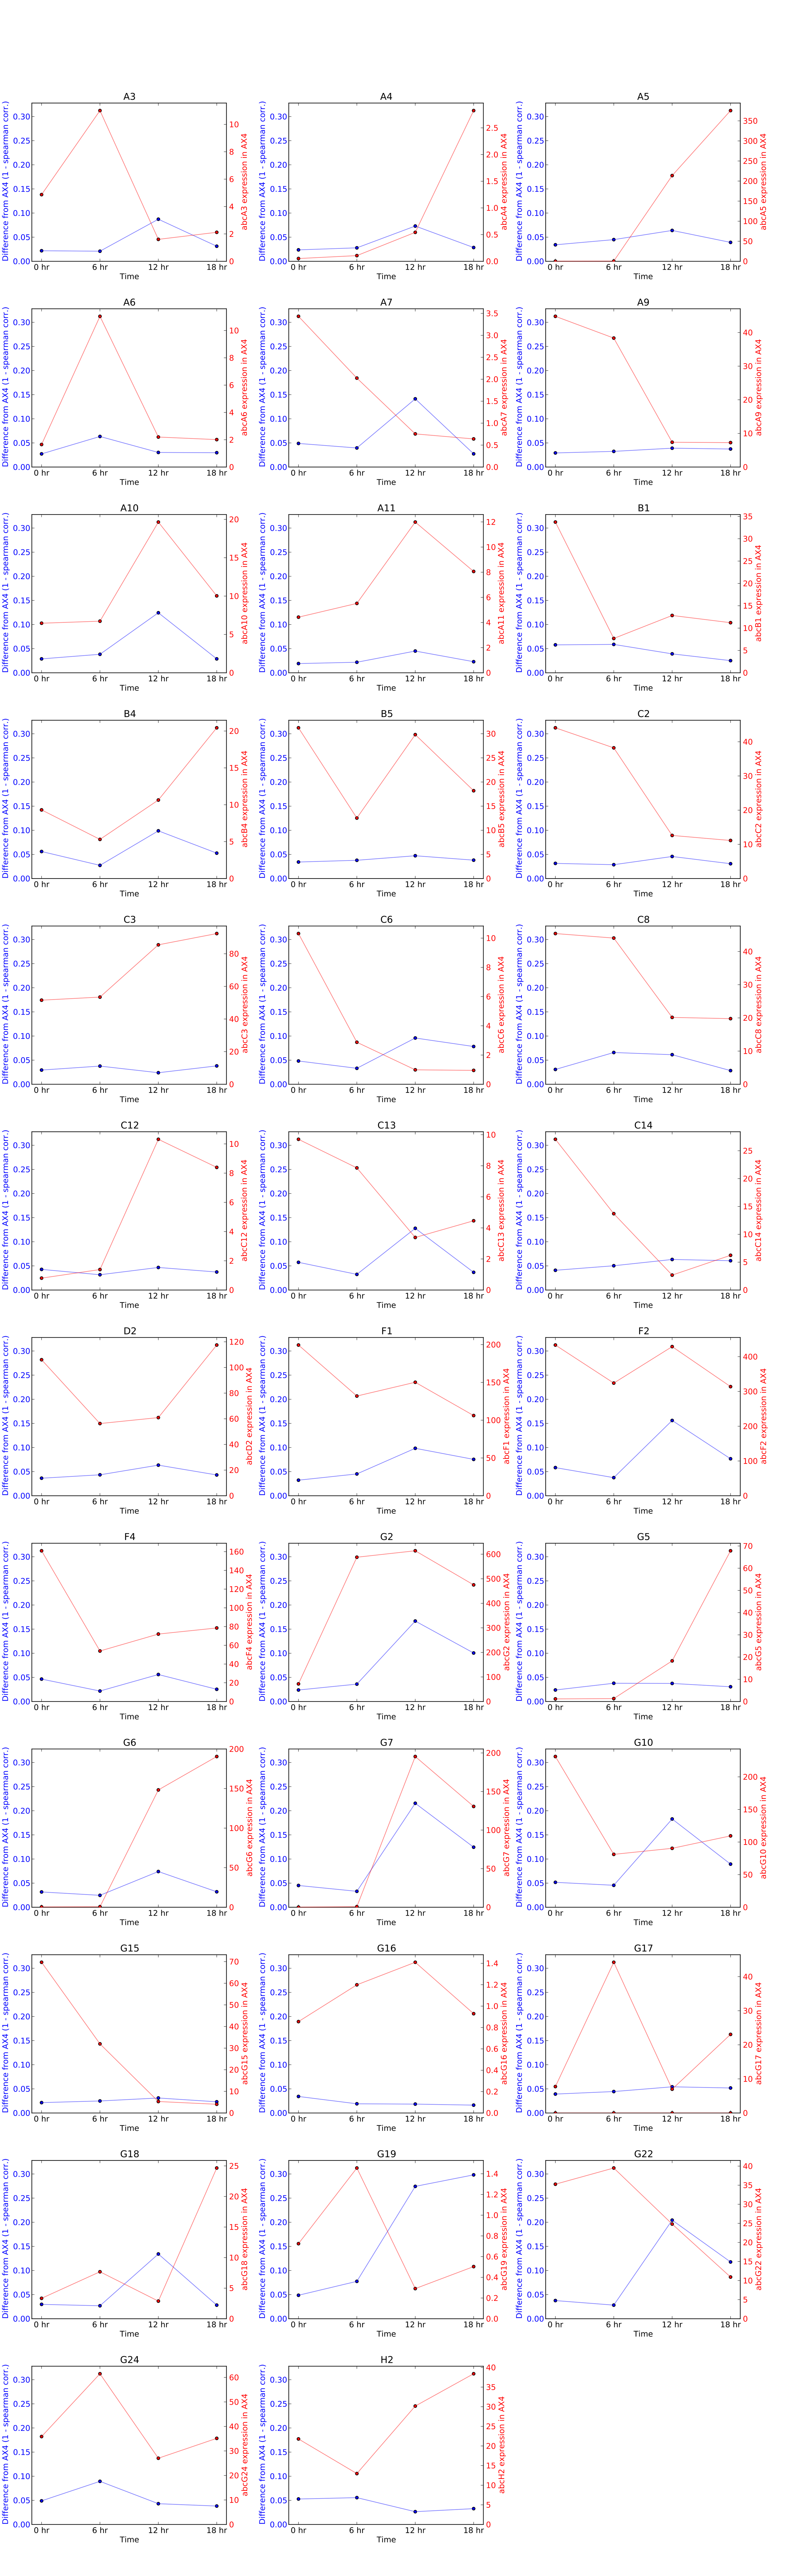

Supplement: pone.0070040.s001.pdf [file pone.0070040.s001.pdf]
